# Supplementary material
Source: publisher figshare collection journal article supplement (https://gsapubs.figshare.com/articles/dataset/_/19067159)
Supplement: Supplementary file 1 [file 1]

Lescoutre, R., Almqvist, B., Koyi, H., Berthet, T., Hedin, P., Galland, O., Brahimi, S., Lorenz, H., and Juhlin, C., 2022, Large-scale, flat-lying mafic intrusions in the Baltican crust and their influence on basement deformation during the Caledonian orogeny: GSA Bulletin, <https://doi.org/10.1130/B36202.1>.

## Supplemental Material

**Table S1.** Acquisition parameters and spatial extent of various aeromagnetic surveys compiled by the SGU from the Jämtland, Västernorrland and Gävleborg counties (central Sweden).

**Table S2.** Gravity measurements along the COSC Composite Seismic Profile (Jämtland county, Sweden).
